# Supplementary material for: Molecular Responses of Human Retinal Cells to Infection with Dengue Virus
Source: Hindawi journal article supplement (doi:10.1155/2017/3164375), 2017-01-01

Figure S1

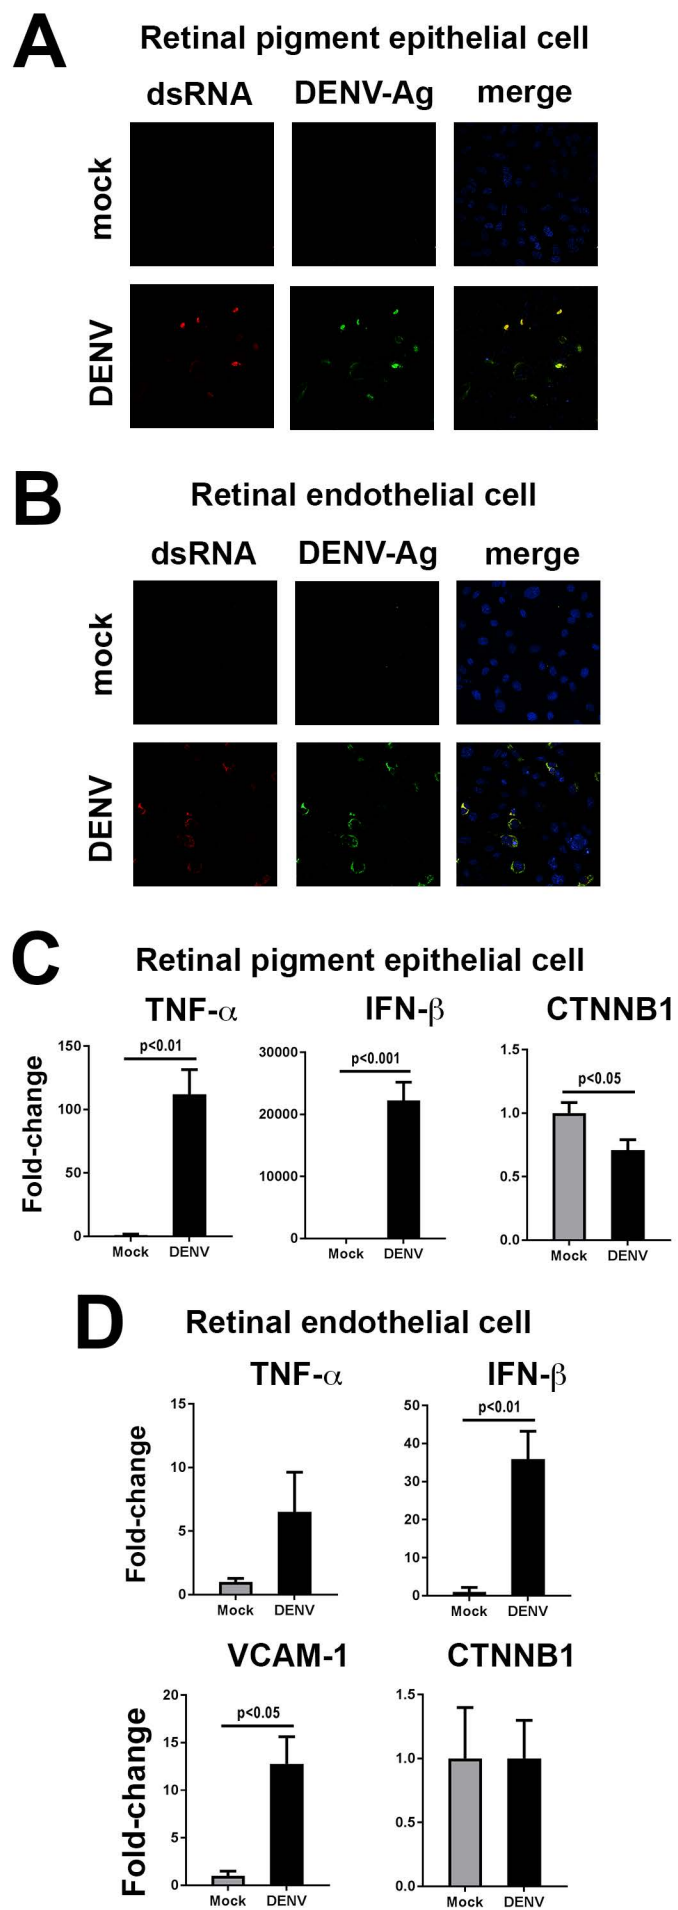

Supplement: f2 [file 3164375.f2.pdf]
